**Weak anti-SARS-CoV-2 antibody response after the first injection of an mRNA  
COVID-19 vaccine in kidney transplant recipients**

Ilies Benotmane<sup>1,2</sup> MD, Gabriela Gautier -Vargas<sup>1</sup> MD, Noelle Cognard<sup>1</sup> MD, Jerome  
Olagne<sup>1</sup> MD, Francoise Heibel<sup>1</sup> MD, Laura Braun-Parvez<sup>1</sup> MD, Jonas Martzloff<sup>1</sup> MD, Peggy  
Perrin<sup>1</sup> MD, Bruno Moulin<sup>1,2</sup> MD, PhD, Samira Fafi-Kremer<sup>2,3</sup> MD, PhD, Sophie Caillard<sup>1,2</sup>  
MD, PhD

*<sup>1</sup>Department of Nephrology and Transplantation, University Hospital, Strasbourg, France*

*<sup>2</sup>Fédération de Médecine Translationnelle (FMTS), Strasbourg, France*

*<sup>3</sup>Department of virology, University Hospital, Strasbourg, France*

Corresponding author: Ilies Benotmane, Department of Nephrology and Transplantation,  
Strasbourg University Hospital, 1 Place de l'Hopital, 67091 Strasbourg, Cedex, France.

E-mail address: [ilies.benotmane@chru-strasbourg.fr](mailto:ilies.benotmane@chru-strasbourg.fr)

Keyword: kidney transplant recipient, COVID-19 vaccine

## **Abstract**

Data concerning the anti-SARS-CoV-2 antibody response after mRNA COVID-19 vaccine in kidney transplant recipients (KTRs) are currently lacking. Here, we sought to examine this issue by analyzing the serological response observed in 241 KTRs after a first vaccine injection. Our results indicate that KTRs have a weak anti-SARS-CoV-2 antibody response, ultimately resulting in a low seroconversion rate (26/241, 10.8%). This phenomenon likely stems from a high immunosuppression burden in this clinical population.

International recommendations on COVID-19 vaccine distribution have given priority to immunocompromised patients – including kidney transplant recipients (KTRs).<sup>1,2</sup> Unfortunately, this guidance has been released without inclusion of this clinical population in vaccine clinical trials. In an effort to shed light on the efficacy and safety of an mRNA COVID-19 vaccine in KTRs, this preliminary study was undertaken to investigate the anti-SARS-CoV-2 antibody response after the first injection. The protocol was reviewed and approved by the local Institutional Review Board (approval number: DC-2013–1990).

We examined 242 KTR who received the first injection of the Moderna mRNA-1273 vaccine (100 µg) at the Strasbourg University Hospital (France) between January 21 and 28, 2021. All had a negative history for COVID-19 and tested negative for anti-SARS-CoV-2 antibodies on the day of the first injection. The anti-SARS-CoV-2 antibody response was assessed at 28 days post-injection using the ARCHITECT IgG II Quant test (Abbott, Abbott Park, IL, USA), with titers >50 AU/mL being considered as positive.

One patient developed mild symptomatic COVID-19 seven days after injection and only 26 (10.8%) KTRs had a positive serology at 28 days post-injection. The median IgG titer was 224 AU/mL (interquartile range: 76–496 AU/mL). Patients who seroconverted had longer time from transplantation, received less immunosuppression, and had a better kidney function (Table 1).

In summary, the burden of immunosuppression may induce a weak anti-SARS-CoV-2 antibody response in KTRs after the first injection of an mRNA COVID-19 vaccine. This finding is strikingly different compared with immunocompetent subjects – who invariably seroconverted after the first injection.<sup>3,4</sup> We highlight the need not to delay the second vaccine injection in immunocompromised patients. Close surveillance is also recommended to discuss the opportunity of a third dose in less responsive patients.

## References

1. COVID-19 Vaccination Program Operational Guidance | CDC.  
<https://www.cdc.gov/vaccines/covid-19/covid19-vaccination-guidance.html>. Accessed March 1st, 2021.
2. ECDC. <https://www.ecdc.europa.eu/sites/default/files/documents/COVID-19-vaccination-and-prioritisation-strategies.pdf>. Accessed March 1st, 2021.
3. Jackson LA, Anderson EJ, Rouphael NG, et al. An mRNA Vaccine against SARS-CoV-2 — Preliminary Report. *N Engl J Med*. 2020;383(20):1920-1931.
4. Prendecki M, Clarke C, Brown J, et al. Effect of previous SARS-CoV-2 infection on humoral and T-cell responses to single-dose BNT162b2 vaccine. *The Lancet*. 2021;0(0).

Table 1 Characteristics of kidney transplant recipients according to serological response after the first dose of the Moderna mRNA-1273 vaccine

|                                                 | Entire cohort<br>(n=241*) | SARS-CoV-2<br>seronegative<br>patients<br>(n=215) | SARS-CoV 2<br>seropositive<br>patients (n=26) | p      | Missing<br>data |
|-------------------------------------------------|---------------------------|---------------------------------------------------|-----------------------------------------------|--------|-----------------|
| <b>Age (years)</b>                              | 57.7 (49.3-67.6)          | 57.7 (49.6-67.7)                                  | 58.4 (43.3--66.9)                             | 0.51   | 0               |
| <b>Male sex</b>                                 | 156 (64.7%)               | 142 (66.1%)                                       | 14 (53.9%)                                    | 0.28   | 0               |
| <b>BMI (kg/m<sup>2</sup>)</b>                   | 25.7 (22.6-29.5)          | 25.7 (22.8-29.4)                                  | 26.4 (21.9-29.9)                              | 0.73   | 2               |
| <b>Time from kidney transplantation (years)</b> | 6.4 (2.9-13)              | 5.8 (2.8-11.9)                                    | 15.4 (8.6-25.9)                               | <0.001 | 2               |
| <b>First transplantation</b>                    | 202 (83.8%)               | 176 (81.8%)                                       | 26 (100%)                                     | 0.01   | 0               |
| <b>Deceased donor</b>                           | 192 (79.6%)               | 172 (80%)                                         | 20 (76.9%)                                    | 0.8    | 0               |
| <b>ABO Group</b>                                |                           |                                                   |                                               | 0.02   | 2               |
| <b>O</b>                                        | 94 (39.3%)                | 82 (38.5%)                                        | 12 (46.2%)                                    |        |                 |
| <b>A</b>                                        | 101 (42.3%)               | 93 (43.7%)                                        | 8 (30.8%)                                     |        |                 |
| <b>B</b>                                        | 30 (12.6%)                | 29 (13.6%)                                        | 1 (3.9%)                                      |        |                 |
| <b>AB</b>                                       | 14 (5.9%)                 | 9 (4.2%)                                          | 5 (19.2%)                                     |        |                 |
| <b>Induction treatment</b>                      |                           |                                                   |                                               | 0.001  | 7               |
| <b>Anti-thymocyte globulin</b>                  | 138 (59.5%)               | 127 (60.8%)                                       | 11 (47.8%)                                    |        | 9               |
| <b>Anti-CD25</b>                                | 88 (37.9%)                | 80 (38.3%)                                        | 8 (34.8%)                                     |        |                 |
| <b>No induction</b>                             | 6 (2.6%)                  | 2 (1%)                                            | 4 (17.4%)                                     |        |                 |
| <b>CNI</b>                                      |                           |                                                   |                                               | 0.06   | 0               |
| <b>Tacrolimus</b>                               | 133 (55.2%)               | 124 (57.7%)                                       | 9 (34.6%)                                     |        |                 |
| <b>Ciclosporin</b>                              | 82 (34%)                  | 69 (32.1%)                                        | 14(50%)                                       |        |                 |
| <b>No CNI</b>                                   | 26 (10.8%)                | 22 (10.2%)                                        | 4 (15.4%)                                     |        |                 |
| <b>MMF/MPA</b>                                  | 191 (79.3%)               | 177 (82.3%)                                       | 14 (53.9%)                                    | 0.002  | 0               |
| <b>Imurel</b>                                   | 7 (2.9%)                  | 4 (1.86%)                                         | 3 (11.5%)                                     | 0.03   | 0               |
| <b>mTOR inhibitors</b>                          | 35 (14.5%)                | 32 (14.9%)                                        | 3 (11.6%)                                     | 1      | 0               |
| <b>Steroids</b>                                 | 142 (58.9%)               | 133 (61.9%)                                       | 9 (34.6%)                                     | 0.01   | 0               |
| <b>Belatacept</b>                               | 9 (3.8%)                  | 9 (4.2%)                                          | 0                                             | 0.26   | 0               |
| <b>eGFR (mL/min/1.73m<sup>2</sup>)</b>          | 51.6 (38.1-68)            | 51 (37.9-66.5)                                    | 64.9 (39.9-72.2)                              | 0.08   | 0               |
| <b>Serum creatinine (µmol/L)</b>                | 118 (99-158)              | 120 (101-159)                                     | 104 (85-134)                                  | 0.05   | 0               |

\*The patient who developed COVID-19 after the first injection was excluded from the analysis.

Continuous variables are presented as medians (interquartile ranges), whereas categorical variables are presented as counts (percentages).

Abbreviations: BMI, body mass index; CNI, calcineurin inhibitors; eGFR, estimated glomerular filtration rate; MMF, mycophenolate mofetil; MPA, mycophenolic acid
